# Supplementary material
Source: publisher figshare collection journal article supplement (https://gsajournals.figshare.com/ndownloader/files/22247592)
Supplement: Supplementary file 1 [file 22247592]

## Sheet: Sheet1
	Gene	AGI	Mutant	Line	Refrences	Forward (genomic PCR)	Reverse (genomic PCR)	T-DNA detection
	MYC2	AT1G32640	jin1-2		Lorenzo (2004)	CGTTTGCAACGGGTAACGCGGTTCG	CGTTAGATCCAGGTGTTC	N/A
	MYC3	AT5G46760	myc3	445B11 GABI-KAT	Fernandez‐Calvo et al., 2011	AAGGTGGGTTGTTGAAATCTAATG	CCACTTATTTTCCTCAGCTTTTTG	ATAATAACGCTGCGGACATCTACATTTT
	MYC4	AT4G17880	myc4	GK 491E10	Fernandez‐Calvo et al., 2011	TCTCTCACAACTTGATCCAGCTAA	CTCCTCTGTCTCTCACCGGA	ATAATAACGCTGCGGACATCTACATTTT
	PIF4	AT2G43010	pif4-101	Garlic_114_G06	Lorrain (2008)	CAGACGGTTGATCATCTG	CTCGATTTCCGGTTATGG	TAGCATCTGAATTTCATAACCAATCTCGATACAC
	PIF5	AT3G59060	pil6-1	SALK_087012	Lorrain (2008)	TCGCTCACTCGCTTACTTAC	TCTCTACGAGCTTGGCTTTG	ATTTTGCCGATTTCGGAAC
	PIF7	AT5G61270	pif7-1	N/A	Leivar (2008)	CATCCTCTGGTTTATCCTATCACGCCG	CCGTTCATGGTCTAGGCG	TGATAGTGACCTTAGGCGACTTTTGAACG
